# Supplementary material for: Loss of Wwox Perturbs Neuronal Migration and Impairs Early Cortical Development
Source: PubMed Central journal article supplement (PMC7300205; doi:10.3389/fnins.2020.00644), 2020-06-11
Supplement: Data_Sheet_1.pdf [file Data_Sheet_1.pdf]

## Supplementary Section

### Supplementary Material

#### *Immunostaining of WWOX-deficient foetal brain*

Tissue blocks of brain parietal coronal sections of the WWOX-deficient foetus terminated at the 21th gestational week and the gestational age-matched male control were dewaxed (2 washes in xylol for 10 min, 2 washes in ethanol 100% for 5min, 5 min in ethanol 95%, 5min in ethanol 90%, 5 min in ethanol 70%) and then rehydrated in distilled water for 5 minutes. The antigen unmasking was performed with citrate solution (10nM sodium citrate buffer, pH 6.0) maintaining at just below boiling temperature for 10 minutes. After washing in distilled water, sections were incubated at room temperature (RT) for 10 minutes with 3% hydrogen peroxide to quench endogenous peroxidase activity. After washing, sections were blocked for 1 hour with 5% Foetal BovinSerum (FBS) in 1X Tris Buffered Saline (TBS) /0.05%Tween 20 (blocking solution), and then incubated with primary anti-TUBA1A antibodies (HPA043684, Sigma-Aldrich, USA) 1:50 overnight at 4°C in a humidified chamber. Sections were washed three times with 0.05% Tween20/1X TBS, incubated with the secondary antibody Alexa Fluor 488-coniugated goat anti-rabbit (Thermo Fisher Scientific, Monza, Italy) diluted 1 hour in blocking solution at RT, washed and mounted with DAPI Fluoromount-G (SouthernBiotech, USA & Canada). Images were taken at 40Xmagnification with AxioVision SE64 Rel.4.9.1 (Carl Zeiss Microscopt GmbH, Jena, Germany). Three region of interest (ROI) were analysed for fluorecence quantification with ImageJ software. The ROIs were positioned in the different part of cortex: molecular layer (ML), external granular layer (EGL).

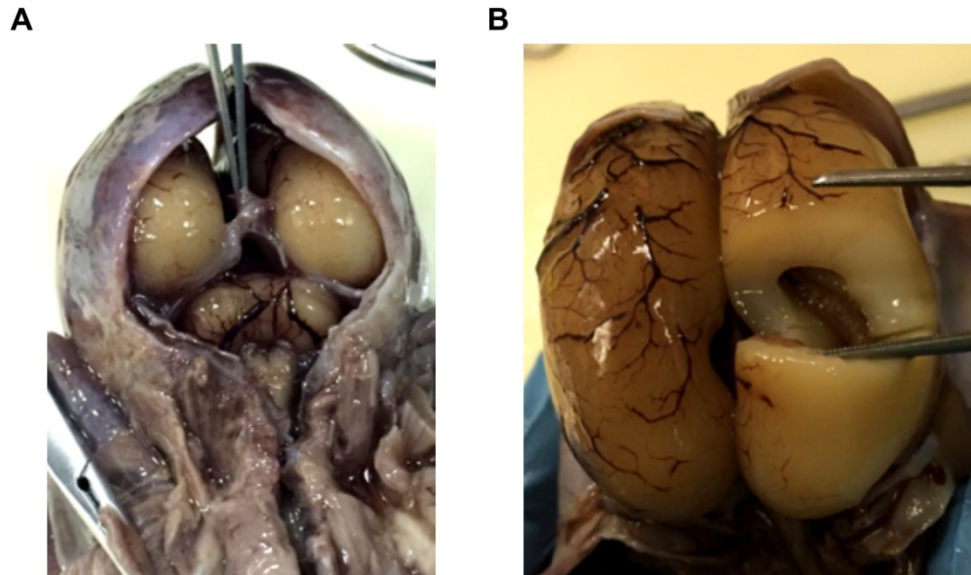

**Supplementary Figure S1. Post-mortem image of foetal brain at 21th gestational age.**

(A)Image showing evidence of cerebellar vermis hypoplasia (B) No macroscopic abnormalities or malformations were detected in the brain of the WOREE affected foetus.

A

## Kinesins

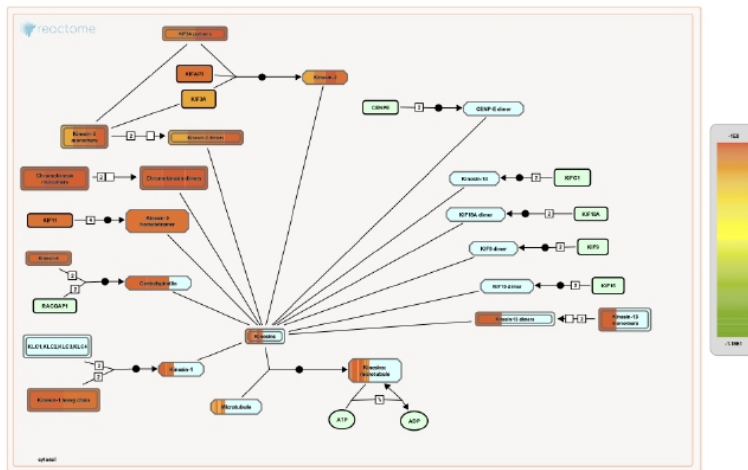

B

### Entities found in the analysis (29)

| Input  | UniProt Id             | logFC ne... |
|--------|------------------------|-------------|
| ITFG1  | Q9Y496                 | -1.82e+00   |
| KIF21B | O75037                 | -1.10e+00   |
| KIF1B  | O60333                 | -1.84e+00   |
| KIF3C  | O14782                 | -1.03e+00   |
| KIF21A | Q72456                 | -1.63e+00   |
| KIF1A  | Q12756                 | -2.78e+00   |
| KIF3B  | O15066                 | -2.18e+00   |
| KIF5C  | Q6PKD1                 | -1.32e+00   |
| KIF3A  | Q9Y496                 | -3.59e+00   |
| KIF5B  | P33176, Q66K46         | -1.80e+00   |
| KIF5A  | Q12840                 | -1.41e+00   |
| KIFAP3 | Q92845                 | -1.77e+00   |
| TUBB6  | Q9BUF5                 | -2.36e+00   |
| KIF23  | Q02241                 | -1.58e+00   |
| KIF22  | Q14807                 | -1.32e+00   |
| TUBB4B | P04350, P68371         | -1.96e+00   |
| TUBB2A | Q13885, Q9BVA1         | -1.84e+00   |
| TUBB2B | Q13885, Q9BVA1         | -1.72e+00   |
| KIF20A | Q95235                 | -1.45e+00   |
| KIF2C  | Q8N4N8, Q99661         | -1.96e+00   |
| KIF16B | Q96L93                 | -1.19e+00   |
| KIF2A  | O00139, Q8N4N8, Q99661 | -1.29e+00   |
| KIF4B  | Q95239, Q2VIQ3         | -1.13e+00   |
| KIF4A  | Q95239                 | -1.02e+00   |
| KIF20B | Q96Q89                 | -1.03e+00   |
| TUBB3  | Q13509                 | -3.96e+00   |
| KIF11  | P52732                 | -1.85e+00   |
| TUBA1A | P68363, Q71U36         | -3.53e+00   |
| TUBA1B | P68363                 | -3.36e+00   |

Supplementary Figure S2. Neural migration-related genes found in the Reactome database (A, B)

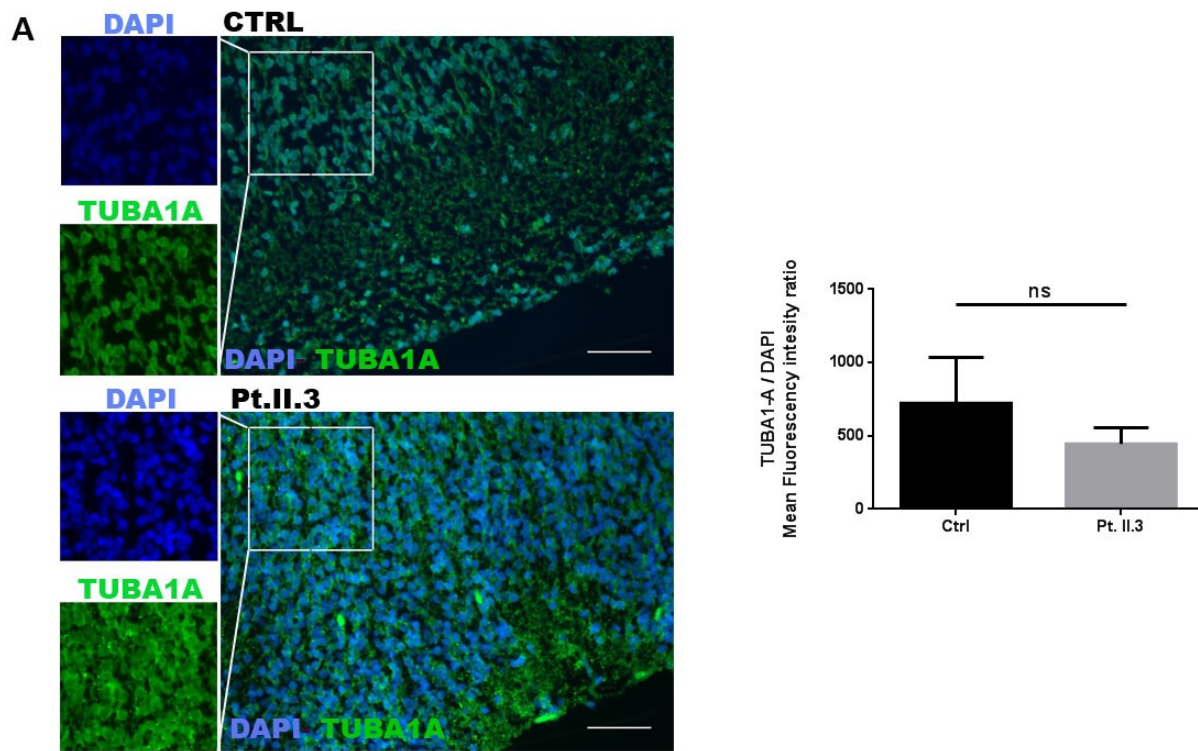

### Supplementary Figure S3. Immunostaining of *WWOX*-deficient foetal brain

(A) Immunofluorescence analysis of human cortex at 21th gestational week. Tuba1a was detected by Alexa 488 (green) conjugated secondary antibody (scale bars 50  $\mu\text{m}$ ). In the upper panel a control of 21th gestational week and in the (lower panel) Individual (Pt.) II.3. In the *WWOX*-deficient developing brain a disorganization of cortical layers compared with control is noticed and abnormal distribution of DAPI (blue) staining is noticed. Graph of quantification of mean fluorescence intensity of Tuba1a normalized on the number of nuclei displayed a slight reduction of intensity in individual (Pt.) II.3 compared to the control.  $N=3$  ROIs were analyzed for each genotype. Data were represented as mean  $\pm$  standard error of the mean (SEM.)  $p=0.5714$  ( $ns \geq 0.05$ ), Mann Whitney's U-test.
